# Supplementary material
Source: HighWire-hosted journal article supplement (http://www.cmaj.ca/highwire/filestream/69618/field_highwire_adjunct_files/1/170676-res-2-at.pdf)
Supplement: 170676-res-2-at.pdf [file 170676-res-2-at.pdf]

**Appendix 2 (as supplied by the authors):** Crude proportion and adjusted relative risk of DKA at diagnosis (effect of age by UPC categories)

| Covariate                             | DKA<br>Crude proportion |             | adjusted RR (95% CI) * |
|---------------------------------------|-------------------------|-------------|------------------------|
|                                       | N                       | %           |                        |
| <b>Age-group (by UPC category) **</b> |                         |             |                        |
| None                                  | <b>1527</b>             | <b>29.7</b> |                        |
| 1-4 y.o.                              | 114                     | 29.0        | 1.12 (0.82, 1.52)      |
| 5-11 y.o.                             | 589                     | 35.0        | 1.34 (1.15, 1.57)      |
| 12-17 y.o.                            | 824                     | 26.1        | 1.00                   |
| Family Physician                      | <b>1437</b>             | <b>24.6</b> |                        |
| 1-4 y.o.                              | 337                     | 29.4        | 1.64 (1.29, 2.08)      |
| 5-11 y.o.                             | 505                     | 29.1        | 1.63 (1.31, 2.08)      |
| 12-17 years                           | 595                     | 18.0        | 1.00                   |
| Pediatrician                          | <b>740</b>              | <b>25.5</b> |                        |
| 1-4 y.o.                              | 215                     | 27.0        | 1.67 (1.15, 2.44)      |
| 5-11 y.o.                             | 309                     | 31.1        | 1.92 (1.36, 2.72)      |
| 12-17 y.o.                            | 216                     | 16.2        | 1.00                   |

Note: CI= confidence interval, RR=relative risk

\* Adjusted for UPC, age group, UPC\*age group (interaction term), sex, SES, rurality

\*\* Interaction term from the final model in Table 2 demonstrating the effect of age group by UPC category. For example, among those with a family physician, children < 12 years of age had a greater risk of DKA compared to those > 12 years of age.
